# Supplementary material
Source: PubMed Central journal article supplement (PMC3690300)
Supplement: NIHMS462461-supplement.pdf [file NIHMS462461-supplement.pdf]

Supplemental Materials, Table S1. Effect estimates (ORs and 95% CI) for ambient residential or workplace exposure to diazinon, chlorpyrifos and parathion and Parkinson's disease by  $PONI_{L55M}$  and  $PONI_{Q192R}$  genotype, Caucasians only and models also adjusted for household OP used

| Exposure                                                     | $PONI_{-55}$ LL+LM  |                                   | $PONI_{-55}$ MM     |                                   |                     |                                   |
|--------------------------------------------------------------|---------------------|-----------------------------------|---------------------|-----------------------------------|---------------------|-----------------------------------|
|                                                              | No. cases/controls  | Adjusted OR (95% CI) <sup>a</sup> | No. cases/controls  | Adjusted OR (95% CI) <sup>a</sup> |                     |                                   |
| <b>Ambient Residential or Workplace Exposure<sup>b</sup></b> |                     |                                   |                     |                                   |                     |                                   |
| <b><i>Diazinon</i></b>                                       |                     |                                   |                     |                                   |                     |                                   |
| Zero Exposure                                                | 61/121              | 1.00                              | 6/16                | 1.00 (0.36-2.77)                  |                     |                                   |
| Low/High Exposure                                            | 156/231             | 1.17 (0.77-1.77)                  | 28/28               | 1.75 (0.92-3.33)                  |                     |                                   |
| <b><i>Chlorpyrifos</i></b>                                   |                     |                                   |                     |                                   |                     |                                   |
| Zero Exposure                                                | 61/121              | 1.00                              | 6/16                | 0.97 (0.35-2.68)                  |                     |                                   |
| Low/High Exposure                                            | 134/188             | 1.35 (0.89-2.07)                  | 26/21               | 2.30 (1.16-4.57)                  |                     |                                   |
| <b><i>Parathion</i></b>                                      |                     |                                   |                     |                                   |                     |                                   |
| Zero Exposure                                                | 61/121              | 1.00                              | 6/16                | 0.99 (0.36-2.76)                  |                     |                                   |
| Low/High Exposure                                            | 134/194             | 1.15 (0.74-1.77)                  | 22/21               | 1.65 (0.81-3.36)                  |                     |                                   |
| Exposure                                                     | $PONI_{-192}$ RR+QR |                                   | $PONI_{-192}$ QQ    |                                   |                     |                                   |
|                                                              | No. cases/controls  | Adjusted OR (95% CI) <sup>a</sup> | No. cases/controls  | Adjusted OR (95% CI) <sup>a</sup> |                     |                                   |
| <b>Ambient Residential or Workplace Exposure<sup>b</sup></b> |                     |                                   |                     |                                   |                     |                                   |
| <b><i>Diazinon</i></b>                                       |                     |                                   |                     |                                   |                     |                                   |
| Zero Exposure                                                | 33/69               | 1.00                              | 32/59               | 1.23 (0.67-2.28)                  |                     |                                   |
| Low/High Exposure                                            | 89/124              | 1.34 (0.78-2.30)                  | 91/107              | 1.53 (0.89-2.63)                  |                     |                                   |
| <b><i>Chlorpyrifos</i></b>                                   |                     |                                   |                     |                                   |                     |                                   |
| Zero Exposure                                                | 33/69               | 1.00                              | 32/59               | 1.21 (0.65-2.23)                  |                     |                                   |
| Low/High Exposure                                            | 73/100              | 1.49 (0.86-2.60)                  | 83/82               | 1.91 (1.11-3.32)                  |                     |                                   |
| <b><i>Parathion</i></b>                                      |                     |                                   |                     |                                   |                     |                                   |
| Zero Exposure                                                | 33/69               | 1.00                              | 32/59               | 1.24 (0.67-2.29)                  |                     |                                   |
| Low/High Exposure                                            | 77/109              | 1.33 (0.76-2.32)                  | 77/82               | 1.61 (0.91-2.83)                  |                     |                                   |
| Exposure                                                     | $PONI_{55LL-192RR}$ |                                   | $PONI_{55LM-192OR}$ |                                   | $PONI_{55MM-192OO}$ |                                   |
|                                                              | No. cases/controls  | Adjusted OR (95% CI) <sup>a</sup> | No. cases/controls  | Adjusted OR (95% CI) <sup>a</sup> | No. cases/controls  | Adjusted OR (95% CI) <sup>a</sup> |
| <b>Ambient Residential or Workplace Exposure<sup>b</sup></b> |                     |                                   |                     |                                   |                     |                                   |
| <b><i>Diazinon</i></b>                                       |                     |                                   |                     |                                   |                     |                                   |
| Zero Exposure                                                | 6/14                | 1.0                               | 53/100              | 1.18 (0.41-3.37)                  | 6/14                | 1.26 (0.31-5.10)                  |
| Low/High Exposure                                            | 19/33               | 1.10 (0.34-3.52)                  | 133/175             | 1.46 (0.52-4.09)                  | 28/23               | 2.35 (0.74-7.42)                  |
| <b><i>Chlorpyrifos</i></b>                                   |                     |                                   |                     |                                   |                     |                                   |
| Zero Exposure                                                | 6/14                | 1.0                               | 53/100              | 1.18 (0.41-3.35)                  | 6/14                | 1.20 (0.30-4.85)                  |
| Low/High Exposure                                            | 15/28               | 1.16 (0.35-3.84)                  | 115/137             | 1.73 (0.62-4.84)                  | 26/17               | 3.10 (0.95-10.08)                 |
| <b><i>Parathion</i></b>                                      |                     |                                   |                     |                                   |                     |                                   |
| Zero Exposure                                                | 6/14                | 1.0                               | 53/100              | 1.18 (0.41-3.38)                  | 6/14                | 1.25 (0.31-5.08)                  |
| Low/High Exposure                                            | 15/29               | 0.99 (0.30-3.30)                  | 117/146             | 1.51 (0.53-4.27)                  | 22/16               | 2.40 (0.72-8.03)                  |

<sup>a</sup> adjusted for age, gender, smoking status, county, education level, and household OP used

<sup>b</sup> reference group of participants is for those unexposed to all three OPs

Supplemental Materials, Table S2. Log likelihood for models including only *PONI*<sub>L55M</sub> or *PONI*<sub>Q192R</sub> genotype or both in the same model

| <b>Models<sup>b</sup></b>                                                                                                                                      | <b>Exposures<sup>a</sup></b> |                     |                  |
|----------------------------------------------------------------------------------------------------------------------------------------------------------------|------------------------------|---------------------|------------------|
|                                                                                                                                                                | <b>diazinon</b>              | <b>chlorpyrifos</b> | <b>parathion</b> |
| Model 1: Exposure+ <i>PONI</i> <sub>L55M</sub> + <i>PONI</i> <sub>L55M</sub> *exposure                                                                         |                              |                     |                  |
| Log Likelihood                                                                                                                                                 | -445.5                       | -443.2              | -445.2           |
| Model2: Exposure+ <i>PONI</i> <sub>Q192R</sub> + <i>PONI</i> <sub>Q192R</sub> *exposure                                                                        |                              |                     |                  |
| Log Likelihood                                                                                                                                                 | -446.3                       | -444.4              | -446.1           |
| Model 3: Exposure+ <i>PONI</i> <sub>L55M</sub> + <i>PONI</i> <sub>L55M</sub> *exposure + <i>PONI</i> <sub>Q192R</sub> + <i>PONI</i> <sub>Q192R</sub> *exposure |                              |                     |                  |
| Log Likelihood                                                                                                                                                 | -444.9                       | -442.9              | -444.9           |

<sup>a</sup> ambient residential or workplace exposure to diazinon, chlorpyrifos, and parathion

<sup>b</sup> the coding for *PONI*<sub>L55M</sub>: LL+LM and MM; for *PONI*<sub>Q192R</sub>: RR+QR and QQ

Supplemental Materials, Table S3. Effect estimates (ORs and 95% CI), for ambient residential exposure to diazinon, chlorpyrifos and parathion and Parkinson's disease by *PONI*<sub>L55M</sub> genotype (for comparison with Manthripragada et al. 2010), all races/ethnicities

| Exposure                                 | <i>PONI-55 LL+LM</i> |          |                                   | <i>PONI-55 MM</i>  |          |                                   |
|------------------------------------------|----------------------|----------|-----------------------------------|--------------------|----------|-----------------------------------|
|                                          | No. cases/controls   | Crude OR | Adjusted OR (95% CI) <sup>a</sup> | No. cases/controls | Crude OR | Adjusted OR (95% CI) <sup>a</sup> |
| <b>Ambient Residential Only Exposure</b> |                      |          |                                   |                    |          |                                   |
| <b><i>Diazinon</i></b>                   |                      |          |                                   |                    |          |                                   |
| Zero Exposure                            | 93/174               | 1.00     | 1.00                              | 11/23              | 0.89     | 1.02 (0.46-2.25)                  |
| Low/High Exposure                        | 169/224              | 1.41     | 1.30 (0.90-1.87)                  | 30/25              | 2.25     | 2.08 (1.11-3.92)                  |
| <b><i>Chlorpyrifos</i></b>               |                      |          |                                   |                    |          |                                   |
| Zero Exposure                            | 93/174               | 1.00     | 1.00                              | 11/23              | 0.89     | 1.05 (0.48-2.31)                  |
| Low/High Exposure                        | 152/181              | 1.57     | 1.45 (1.00-2.11)                  | 25/21              | 2.23     | 2.09 (1.07-4.10)                  |
| <b><i>Parathion</i></b>                  |                      |          |                                   |                    |          |                                   |
| Zero Exposure                            | 93/174               | 1.00     | 1.00                              | 11/23              | 0.89     | 1.07 (0.48-2.38)                  |
| Low/High Exposure                        | 141/198              | 1.33     | 1.08 (0.74-1.59)                  | 20/20              | 1.87     | 1.36 (0.65-2.81)                  |

<sup>a</sup> adjusted for age, gender, race, smoking status, county, and education level

Supplemental Materials, Table S4. Effect estimates (ORs and 95% CI) for ambient residential or workplace exposure to diazinon, chlorpyrifos and parathion and Parkinson's disease by *PONI*<sub>C-108T</sub> genotype, Caucasians only

| Exposure                                         | <i>PONI -108 CC</i> |          |                                   | <i>PONI -108 CT</i> |          |                                   | <i>PONI -108 TT</i> |          |                                   |
|--------------------------------------------------|---------------------|----------|-----------------------------------|---------------------|----------|-----------------------------------|---------------------|----------|-----------------------------------|
|                                                  | No. cases/controls  | Crude OR | Adjusted OR (95% CI) <sup>a</sup> | No. cases/controls  | Crude OR | Adjusted OR (95% CI) <sup>a</sup> | No. cases/controls  | Crude OR | Adjusted OR (95% CI) <sup>a</sup> |
| <b>Ambient Residential or Workplace Exposure</b> |                     |          |                                   |                     |          |                                   |                     |          |                                   |
| <i>Diazinon</i>                                  |                     |          |                                   |                     |          |                                   |                     |          |                                   |
| Zero Exposure                                    | 21/28               | 1.00     | 1.00                              | 30/69               | 0.74     | 0.77 (0.49-1.20)                  | 13/30               | 0.55     | 0.59 (0.24-1.45)                  |
| Low/High Exposure                                | 46/69               | 0.97     | 0.86 (0.45-1.62)                  | 76/104              | 1.15     | 1.01 (0.57-1.81)                  | 49/52               | 1.36     | 1.20 (0.63-2.28)                  |
| <i>Chlorpyrifos</i>                              |                     |          |                                   |                     |          |                                   |                     |          |                                   |
| Zero Exposure                                    | 21/28               | 1.00     | 1.00                              | 30/69               | 0.74     | 0.76 (0.48-1.19)                  | 13/30               | 0.55     | 0.58 (0.23-1.42)                  |
| Low/High Exposure                                | 44/46               | 1.32     | 1.25 (0.65-2.41)                  | 68/90               | 1.25     | 1.19 (0.66-2.13)                  | 37/42               | 1.20     | 1.13 (0.58-2.20)                  |
| <i>Parathion</i>                                 |                     |          |                                   |                     |          |                                   |                     |          |                                   |
| Zero Exposure                                    | 21/28               | 1.00     | 1.00                              | 30/69               | 0.74     | 0.76 (0.48-1.20)                  | 13/30               | 0.55     | 0.58 (0.23-1.43)                  |
| Low/High Exposure                                | 36/51               | 1.02     | 0.89 (0.45-1.73)                  | 68/90               | 1.18     | 1.04 (0.57-1.88)                  | 41/44               | 1.35     | 1.21 (0.62-2.36)                  |

<sup>a</sup> adjusted for age, gender, smoking status, county, and education level
